# Supplementary material for: Performance of the Adriatic Sea and Coast (AdriSC) climate component – a COAWST V3.3-based coupled atmosphere–ocean modelling suite: atmospheric dataset
Source: Copernicus journal article supplement (doi:10.5194/gmd-14-3995-2021), 2021-06-29
Supplement: Supplementary file 1 [file gmd-14-3995-2021-supplement.pdf]

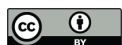

*Supplement of*

**Performance of the Adriatic Sea and Coast (AdriSC) climate component – a COAWST V3.3-based coupled atmosphere–ocean modelling suite: atmospheric dataset**

**Cléa Denamiel et al.**

*Correspondence to:* Cléa Denamiel (cdenami@irb.hr)

The copyright of individual parts of the supplement might differ from the article licence.

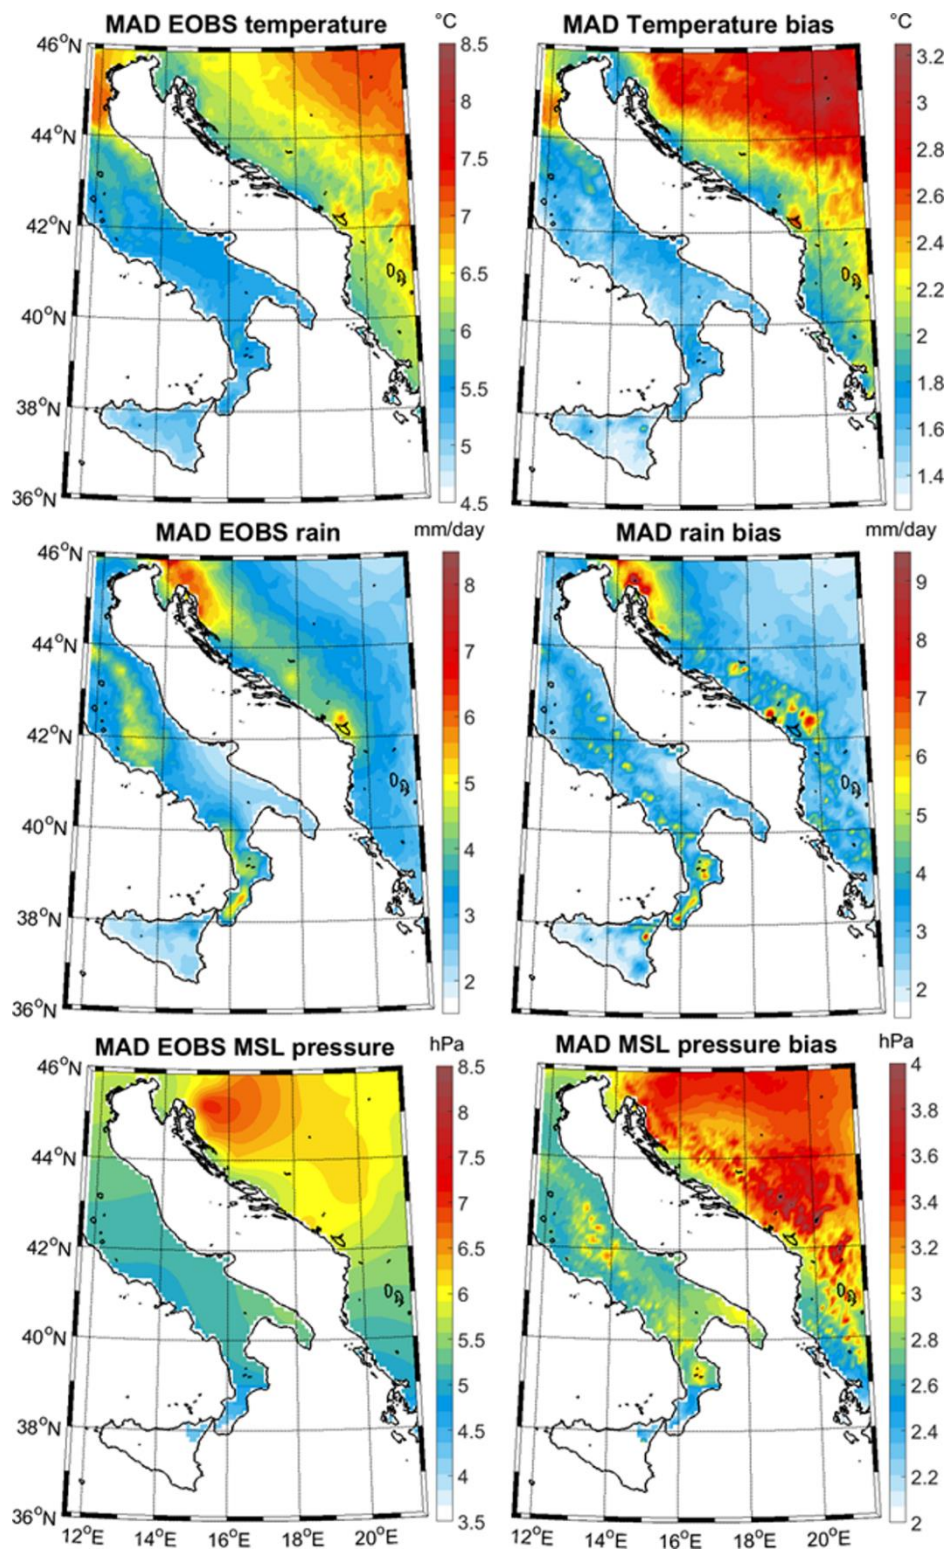

Figure S1. MAD of the E-OBS daily mean temperature, rain and mean sea-level pressure datasets over the land (left panels) as well as MAD (right panels) of the daily temperature, rain and mean sea-level biases between AdriSC WRF 3-km model results and E-OBS datasets over the land during the 1987-2017 period.

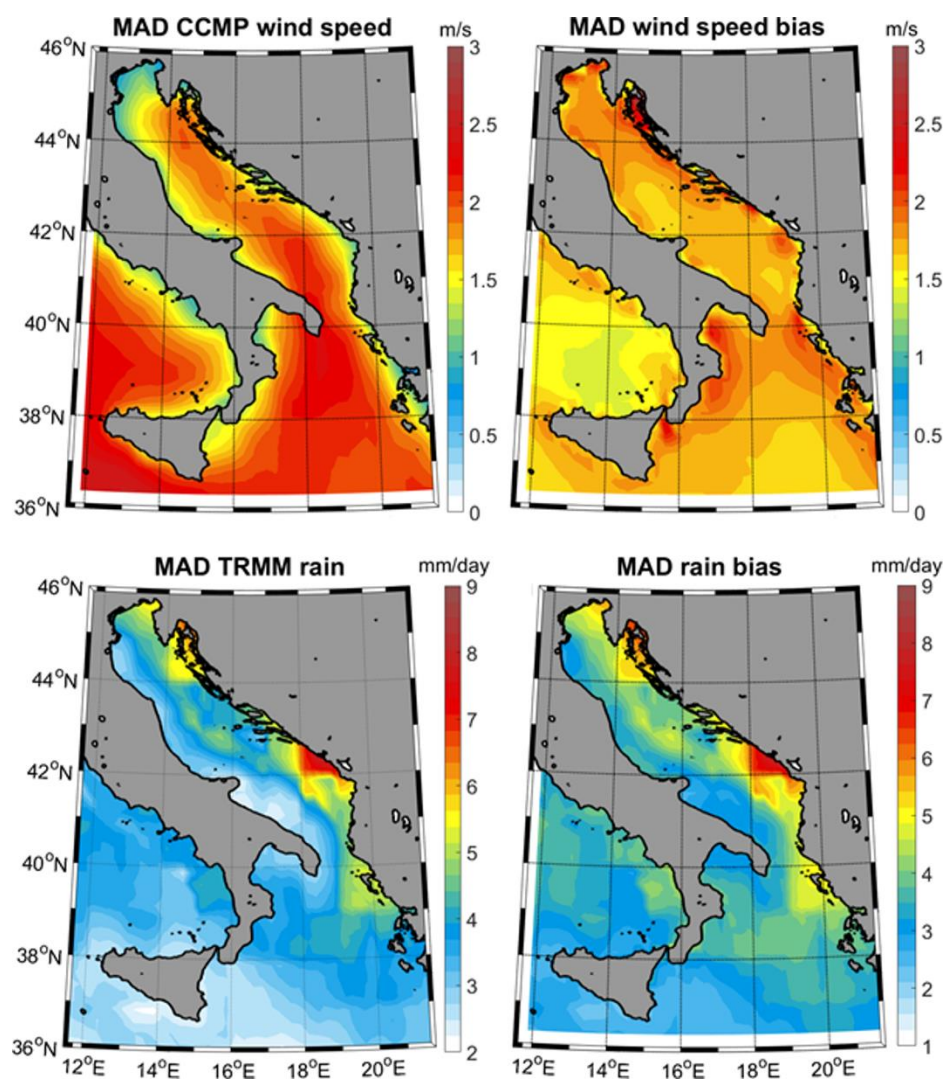

Figure S2. MAD of both the CCMP 6-hourly wind speed and the TRMM daily rain over the sea (left panels) as well as MAD (right panels) of the 6-hourly wind speed and daily rain biases between AdriSC WRF 3-km model results and the CCMP and TRMM datasets over the sea.

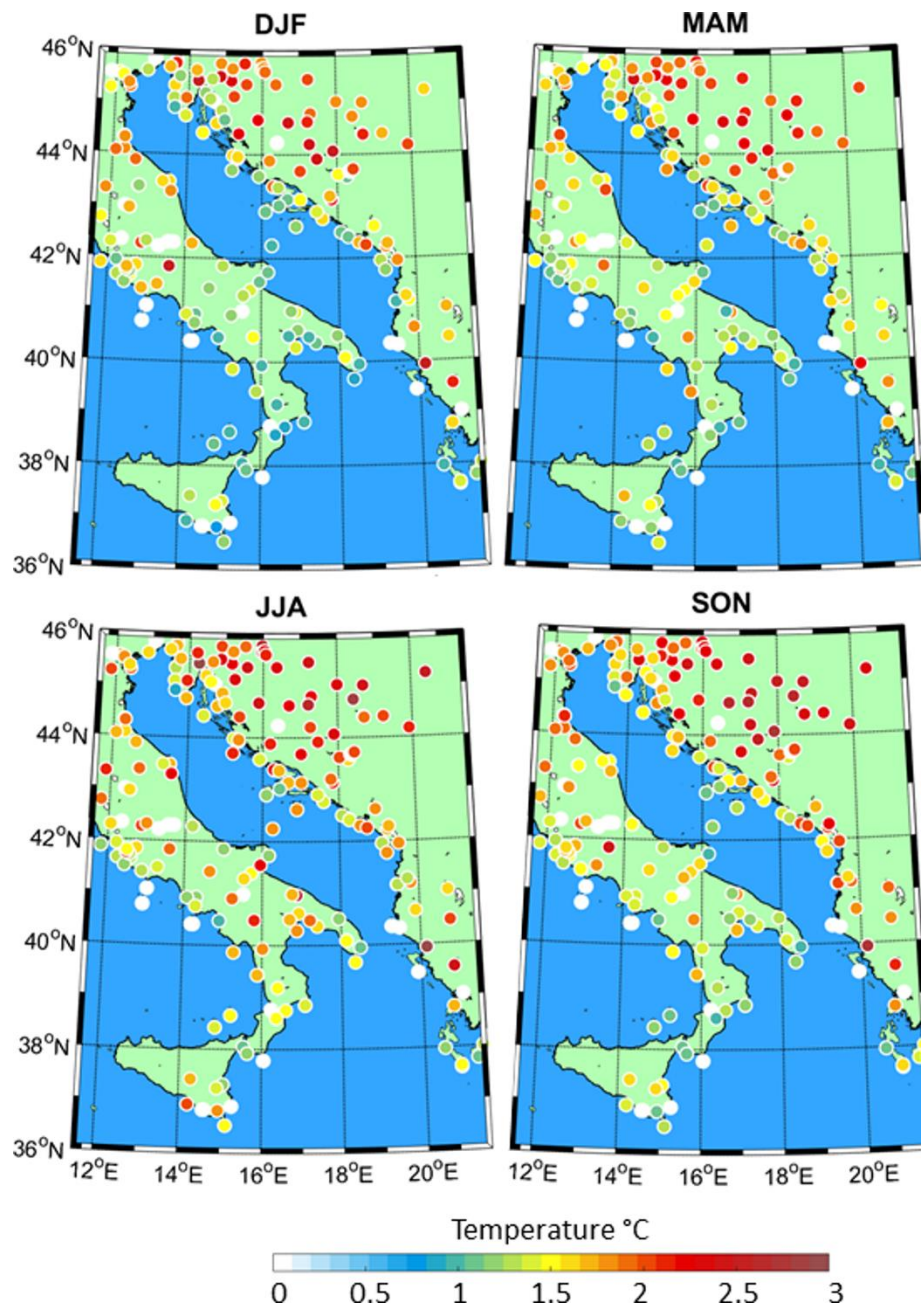

**Figure S3.** Seasonal variations of the MAD hourly temperature bias between AdriSC WRF 3-km model results and NOAA land station measurements during winter (DJF), spring (MAM), summer (JJA) and autumn (SON) for the 1987-2017 period.



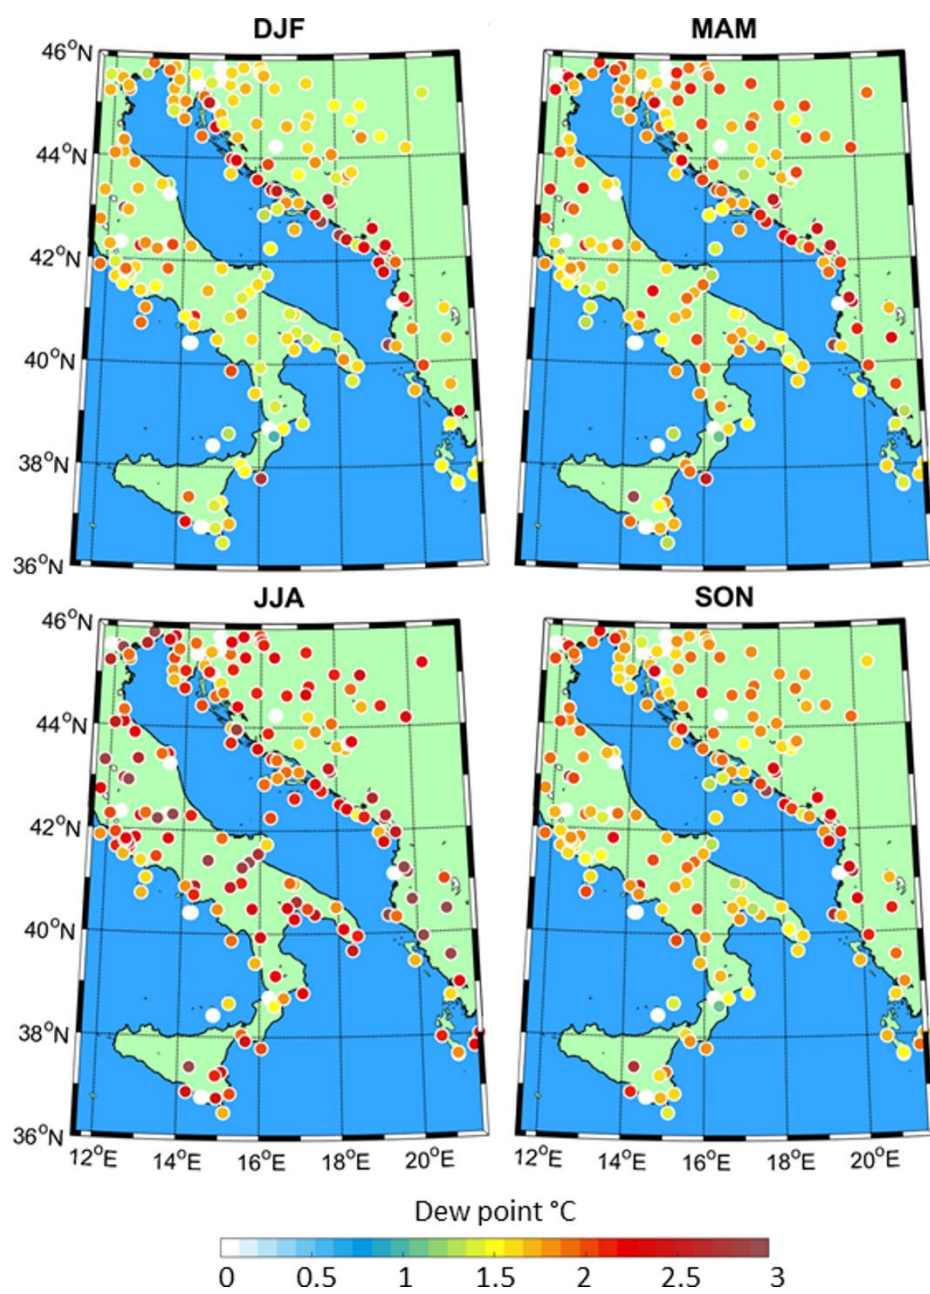

Figure S4. As in Fig. S3 but for the hourly dew point bias.

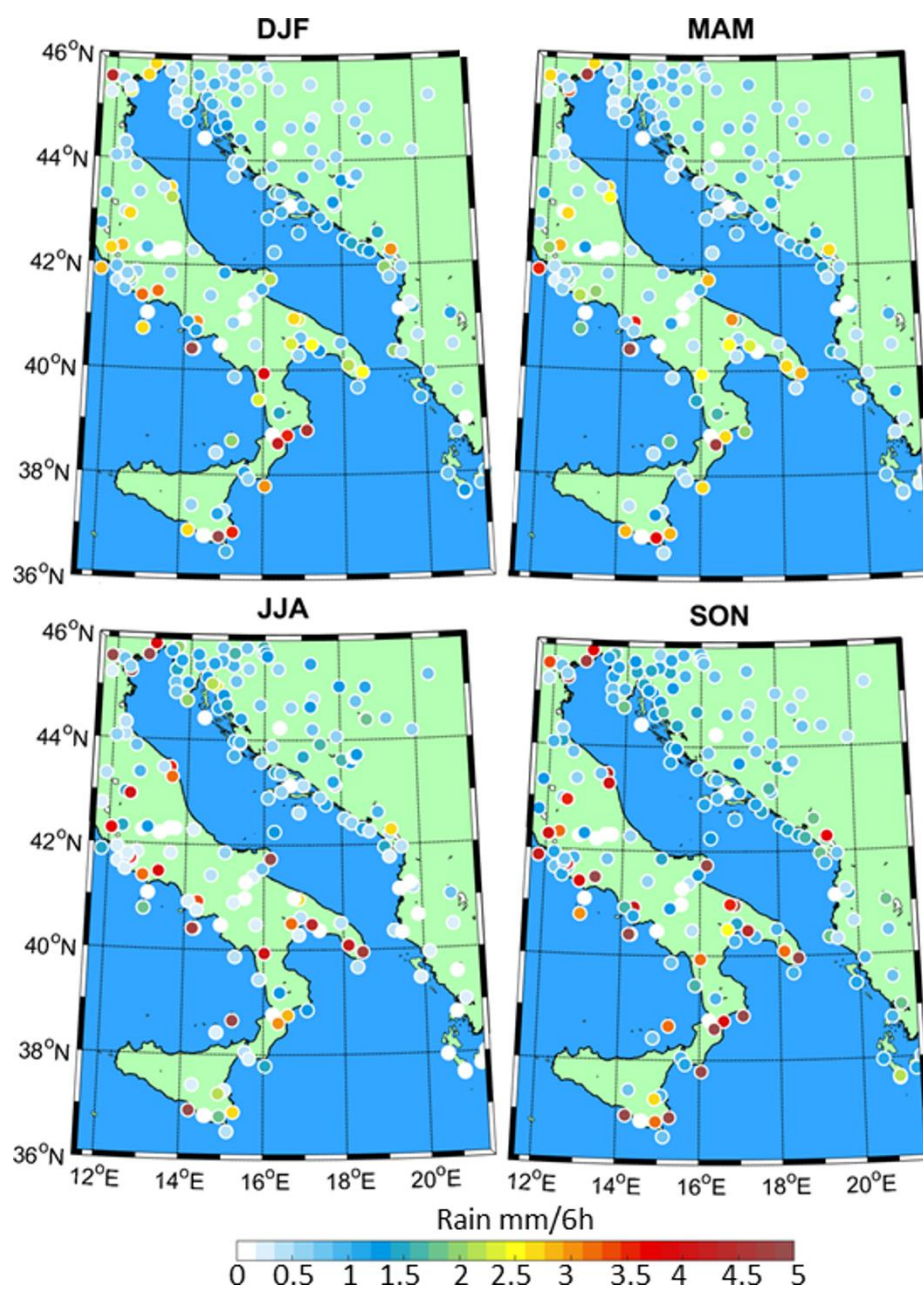

Figure S5. As in Fig. S3 but for the mean 6-hourly rain bias.

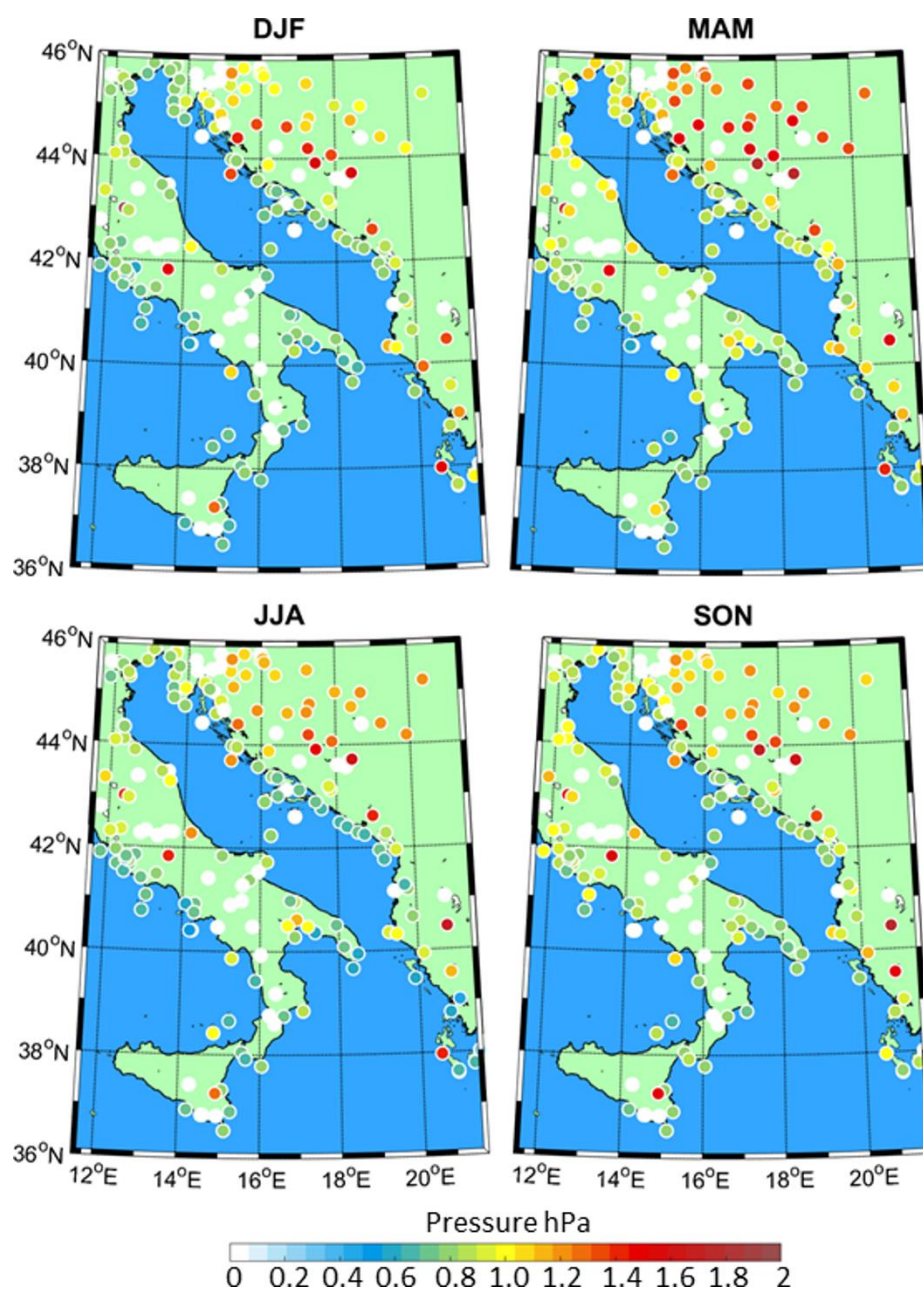

Figure S6. As in Fig. S3 but for the hourly pressure bias.



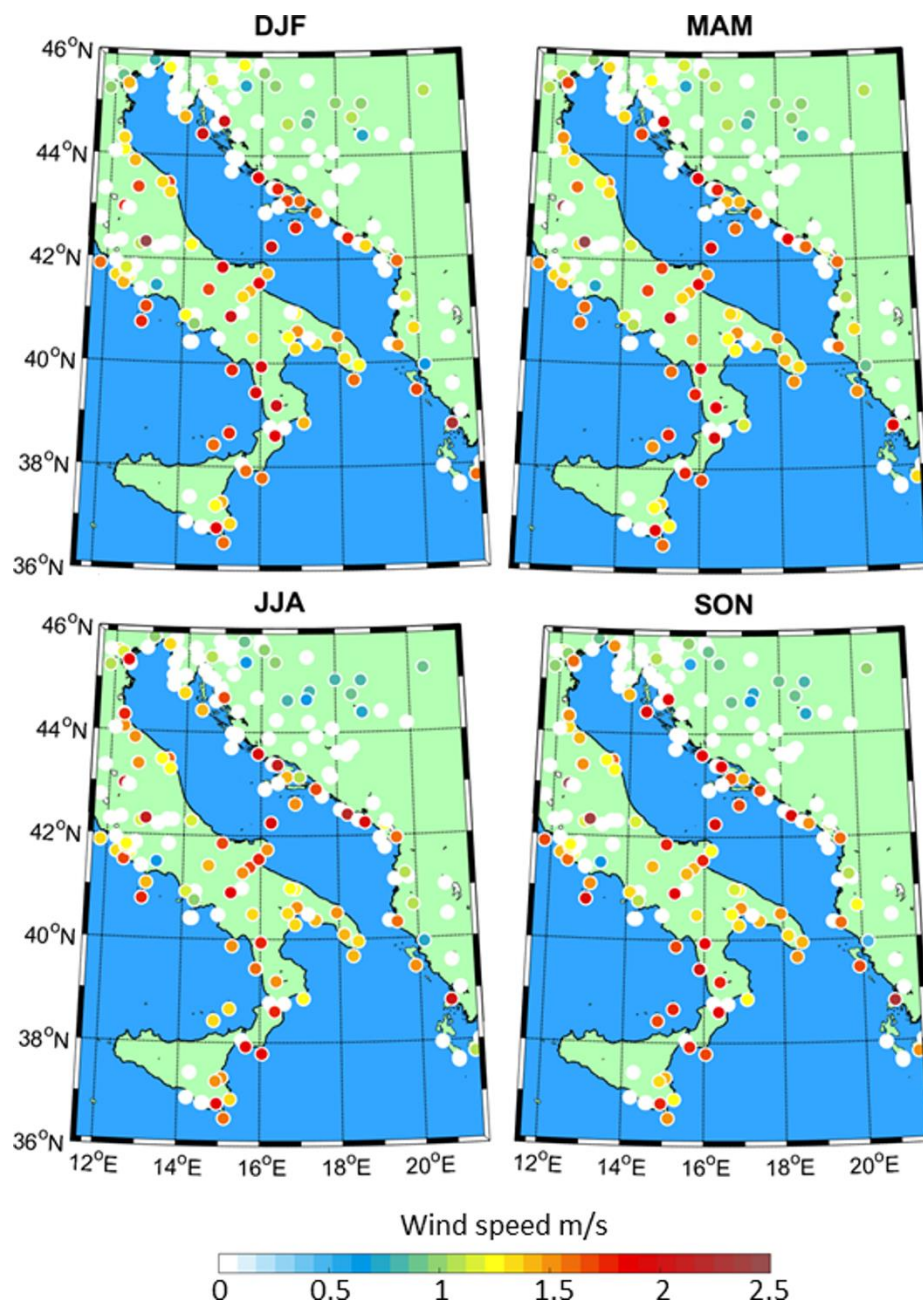

Figure S7. As in Fig. S3 but for the hourly wind speed bias.
